# Supplementary material for: Predictors for earlier return to work of cancer patients
Source: PubMed Central journal article supplement (PMC5884890; doi:10.1007/s11764-017-0655-7), 2017-10-26
Supplement: 11764_2017_655_MOESM1_ESM.pdf [file 11764_2017_655_MOESM1_ESM.pdf]

## Online Resource 1

*Article title:* Predictors for earlier return to work of cancer patients

*Authors:* Wolvers MDJ, Leensen MCJ, Groeneveld IF, Frings-Dresen MHW, De Boer AGEM

*Journal:* Journal of Cancer Survivorship

*Corresponding author:* A.G.E.M. de Boer, Academic Medical Center, department: Coronel Institute of Occupational Health, Amsterdam Public Health research institute, Amsterdam, the Netherlands (a.g.deboer@amc.uva.nl | +31 20 566 5323)

## Additional results on preliminary analyses

### Missing data

The amount of missing data of the independent variables on the three assessments (baseline, six months (T1), 12 months (T2)) is presented in Table 4.

**Table 1. Missing information of covariates**

|                   | fraction missing data at baseline | fraction missing data at T1 | fraction missing data at T2 |
|-------------------|-----------------------------------|-----------------------------|-----------------------------|
| Work ability      | 0.03                              | 0.13                        | 0.24                        |
| Job self-efficacy | 0.07                              | 0.16                        | 0.25                        |
| Value of work     | 0.01                              | 0.13                        | 0.24                        |
| Fatigue           | 0.06                              | 0.15                        | 0.24                        |

### Potential confounders

Both prognostic factors and timing variables were studied separately for confounding effects on partial and full return to work. To limit the number of 'events per factor', the most significant predictor (as indicated by the lowest *p*-value) in each confounder category was used to adjust the analyses: one prognostic factor was included as covariate and one timing variable was used for stratification. All results are presented in Table 5.

Figure 3 shows the stratified survival plots of the selected confounding factors.

**Table 2. Predictive value of prognostic factors and timing**

|                             | Partial RTW                |                   | Full RTW                  |                 |
|-----------------------------|----------------------------|-------------------|---------------------------|-----------------|
|                             | <i>HR (/log-rank test)</i> | <i>p</i> -value   | <i>HR</i>                 | <i>p</i> -value |
| <b>Prognostic factors</b>   |                            |                   |                           |                 |
| age (years)                 | 1.035                      | .067 <sup>b</sup> | 1.034                     | .109            |
| - age < 45 <sup>a</sup>     | 0.659                      | .166              | 0.831                     | .571            |
| Education (3 cat)           | (CHI <sup>2</sup> =1.401)  | .496              | (CHI <sup>2</sup> =7.247) | .027            |
| - education low (2 cat)     | 1.167                      | .653              | 2.316                     | .018            |
| NO physically demanding job | 1.122                      | .634              | 0.732                     | .248            |
| NOT 'sole breadwinner'      | 0.523                      | .008              | 0.979                     | .938            |
| <b>Timing, days since</b>   |                            |                   |                           |                 |
| diagnosis (days)            | 1.003                      | .436              | 0.997                     | .327            |

|                                |                     |      |                     |                   |
|--------------------------------|---------------------|------|---------------------|-------------------|
| - days < 76 (median)           | ( $CHI^2 = 0.471$ ) | .493 | ( $CHI^2 = 0.350$ ) | .554              |
| - days < 100                   | ( $CHI^2 = 0.076$ ) | .782 | ( $CHI^2 = 2.045$ ) | .153              |
| - days < 100                   | .925                | .783 | 1.618               | .157              |
| first day of sick leave (days) | 1.004               | .075 | 0.997               | .222              |
| - days < 90                    | ( $CHI^2 = 0.833$ ) | .361 | ( $CHI^2 = 3.650$ ) | .056 <sup>b</sup> |
| - days < 90                    | 0.793               | .363 | 1.793               | .060 <sup>b</sup> |
| first chemotherapy (days)      | 1.011               | .038 | 1.006               | .299              |
| - days < 0                     | ( $CHI^2 = 1.970$ ) | .160 | ( $CHI^2 = 0.117$ ) | .733              |
| - days < 14                    | ( $CHI^2 = 2.742$ ) | .098 | ( $CHI^2 = 1.268$ ) | .260              |
| - days < 0                     | 1.474               | .152 | 1.110               | .733              |

Note: RTW is return to work. The 'most significant' prediction of all potential confounders in each cell is in *italics*. These analyses were performed on the original dataset, so cases were excluded in case of missing data.<sup>a</sup> Split in accordance with Roelens et al.<sup>b</sup> Does not satisfy proportional hazard assumption.

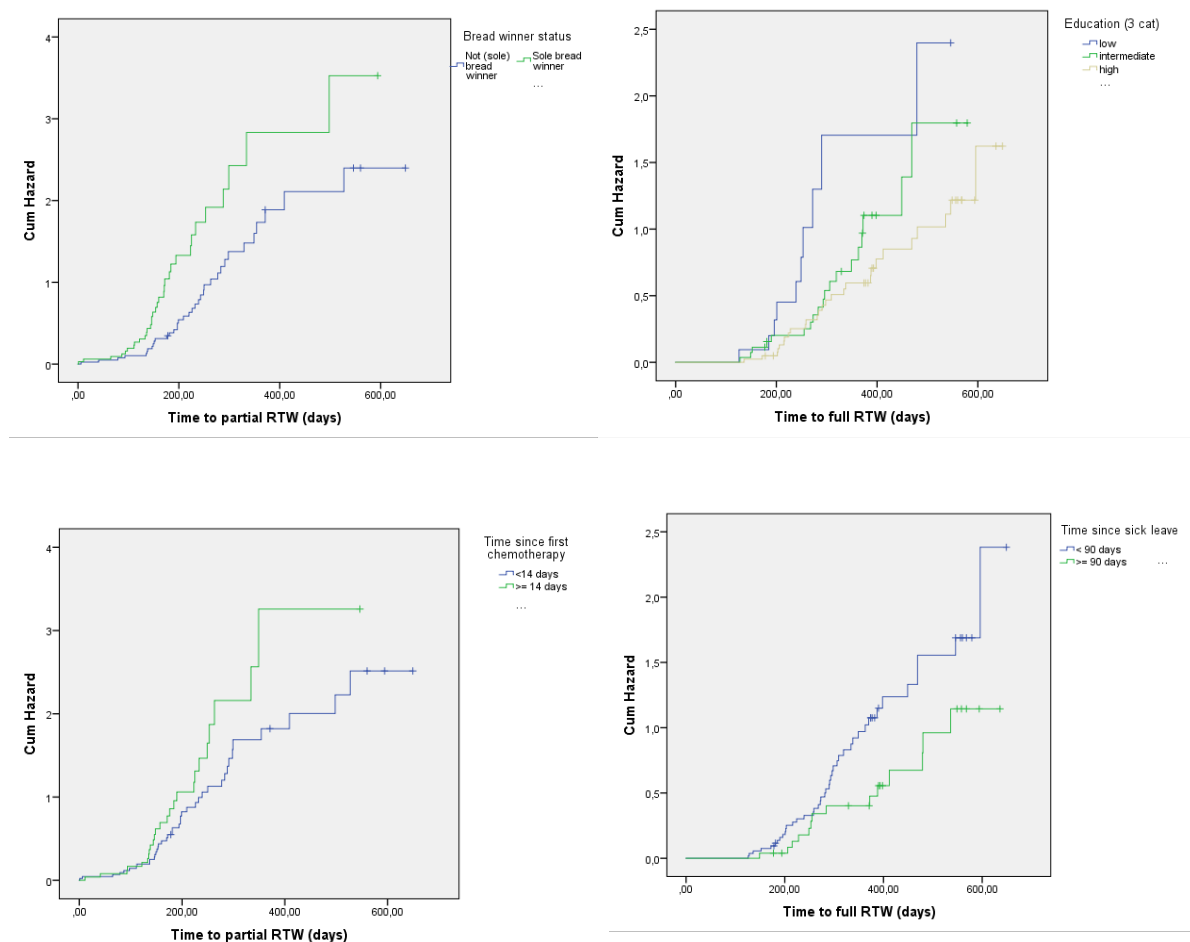

**Figure 1. Hazard functions of confounding factors.** Partial return to work (RTW) was adjusted for breadwinner status and time since first chemotherapy. Full RTW was adjusted for educational level and time since first sick leave. Stratified cumulative hazard plots for education represent three categories, however a dummy representing low vs. intermediate AND high education was used to adjust analyses of full RTW.
